# Supplementary material for: Evaluation of ViroTrack Sero Zika IgG/IgM, a New Rapid and Quantitative Zika Serological Diagnostic Assay
Source: Diagnostics (Basel). 2020 Jun 4;10(6):372. doi: 10.3390/diagnostics10060372 (PMC7345115; doi:10.3390/diagnostics10060372)
Supplement: Supplementary file 1 [file diagnostics-10-00372-s001.xlsx]

## Sheet: Table 1. Zika Dengue sample
Supplementary table 1: samples information				*For samples before 5 days post-onset of symptoms are highlighted with green. *For samples between 5 to 120 days post-onset of symptoms are highlighted with red. *For samples after 120 days post-onset of symptoms are highlighted with orange
ZIKV
No.	internal No.	Cat. No.	Serological study group	Geographic Region	Days between symptoms onset and collection	Gender	Pregnancy (Trimester)	Supplier	Panel number
1	101	1043-TDS-0056	2	Dominican Republic	7	Male	No	Boca Biolistic	control
2	103	1043-TDS-0179	2	Dominican Republic	4	Male	No	Boca Biolistic	control
3		Panel B Member #2	2	Dominican Republic	2	Female	No	Boca Biolistic	Panel B
4		Panel B Member #3	2	Dominican Republic	6	Female	No	Boca Biolistic	Panel B
5		Panel B Member #4	2	Dominican Republic	4	Female	No	Boca Biolistic	Panel B
6		Panel B Member #7	2	Dominican Republic	4	Female	No	Boca Biolistic	Panel B
7		Panel B Member #8	2	Dominican Republic	4	Male	No	Boca Biolistic	Panel B
8		Panel B Member #9	2	Dominican Republic	4	Female	No	Boca Biolistic	Panel B
9		Panel B Member #10	2	Dominican Republic	2	Female	No	Boca Biolistic	Panel B
10		Panel B Member #11	2	Dominican Republic	9	Female	No	Boca Biolistic	Panel B
11		Panel B Member #12	2	Dominican Republic	3	Female	No	Boca Biolistic	Panel B
12		Panel B Member #13	2	Dominican Republic	4	Female	No	Boca Biolistic	Panel B
13		Panel B Member #14	2	Dominican Republic	5	Female	No	Boca Biolistic	Panel B
14		Panel B Member #15	2	Dominican Republic	5	Female	No	Boca Biolistic	Panel B
15		Panel B Member #17	2	Dominican Republic	4	Male	No	Boca Biolistic	Panel B
16		Panel B Member #18	2	Dominican Republic	4	Female	2nd Trimester	Boca Biolistic	Panel B
17		Panel B Member #20	2	Dominican Republic	3	Female	2nd Trimester	Boca Biolistic	Panel B
18		Panel B Member #21	2	Dominican Republic	4	Female	No	Boca Biolistic	Panel B
19		Panel B Member #22	2	Dominican Republic	6	Female	2nd Trimester	Boca Biolistic	Panel B
20		Panel B Member #23	2	Dominican Republic	5	Male	2nd Trimester	Boca Biolistic	Panel B
21		Panel B Member #24	2	Dominican Republic	5	Male	No	Boca Biolistic	Panel B
22		Panel B Member #25	2	Dominican Republic	7	Female	No	Boca Biolistic	Panel B
23	220-1	1043-TDS-0220	1 and 2	Dominican Republic	6	Male	No	Boca Biolistic	ZIKV Series
24	220-2	1043-TDS-0220	1 and 2	Dominican Republic	25	Male	No	Boca Biolistic	ZIKV Series
25	220-3	1043-TDS-0220	1 and 2	Dominican Republic	33	Male	No	Boca Biolistic	ZIKV Series
26	220-4	1043-TDS-0220	1 and 2	Dominican Republic	40	Male	No	Boca Biolistic	ZIKV Series
27	220-5	1043-TDS-0220	1 and 2	Dominican Republic	47	Male	No	Boca Biolistic	ZIKV Series
28	220-6	1043-TDS-0220	1 and 2	Dominican Republic	62	Male	No	Boca Biolistic	ZIKV Series
29	220-7	1043-TDS-0220	1 and 2	Dominican Republic	69	Male	No	Boca Biolistic	ZIKV Series
30	230-2	1043-TDS-0230	1 and 2	Dominican Republic	13	Female	No	Boca Biolistic	ZIKV Series
31	230-3	1043-TDS-0230	1 and 2	Dominican Republic	18	Female	No	Boca Biolistic	ZIKV Series
32	230-4	1043-TDS-0230	1 and 2	Dominican Republic	21	Female	No	Boca Biolistic	ZIKV Series
33	230-5	1043-TDS-0230	1 and 2	Dominican Republic	28	Female	No	Boca Biolistic	ZIKV Series
34	230-6	1043-TDS-0230	1 and 2	Dominican Republic	35	Female	No	Boca Biolistic	ZIKV Series
35	230-8	1043-TDS-0230	1 and 2	Dominican Republic	49	Female	No	Boca Biolistic	ZIKV Series
36	238-1	1043-TDS-0238	1 and 2	Dominican Republic	5	Female	No	Boca Biolistic	ZIKV Series
37	238-3	1043-TDS-0238	1 and 2	Dominican Republic	26	Female	No	Boca Biolistic	ZIKV Series
38	238-4	1043-TDS-0238	1 and 2	Dominican Republic	34	Female	No	Boca Biolistic	ZIKV Series
39	238-5	1043-TDS-0238	1 and 2	Dominican Republic	41	Female	No	Boca Biolistic	ZIKV Series
40	238-6	1043-TDS-0238	1 and 2	Dominican Republic	48	Female	No	Boca Biolistic	ZIKV Series
41	238-7	1043-TDS-0238	1 and 2	Dominican Republic	55	Female	No	Boca Biolistic	ZIKV Series
42		P4-A	2	USA, NY	120	N/A	N/A	BARDA	N/A
43		P4-B	2	USA, PR	56	N/A	N/A	BARDA	N/A
44		P4-C	2	USA, PR	56	N/A	N/A	BARDA	N/A
45		P4-D	2	USA, NY	84	N/A	N/A	BARDA	N/A
46		P4-E	2	USA, PR	56	N/A	N/A	BARDA	N/A
47		P4-F	2	USA, PR	56	N/A	N/A	BARDA	N/A
48		P4-G	2	N/A	N/A	N/A	N/A	BARDA	N/A
49		P4-H	2	USA, PR	56	N/A	N/A	BARDA	N/A
50		P4-I	2	USA, NY	120	N/A	N/A	BARDA	N/A
51		P4-J	2	USA, PR	56	N/A	N/A	BARDA	N/A
52		P4-K	2	USA, PR	56	N/A	N/A	BARDA	N/A
53		P4-L	2	USA, PR	56	N/A	N/A	BARDA	N/A
54		P4-M	2	USA, PR	56	N/A	N/A	BARDA	N/A
55		P4-N	2	N/A	N/A	N/A	N/A	BARDA	N/A
56		P4-O	2	USA, NY	150	N/A	N/A	BARDA	N/A
57		P4-P	2	USA, TX	84	N/A	N/A	BARDA	N/A
58		P5-A	2	USA, PR	56	N/A	N/A	BARDA	N/A
59		P5-B	2	USA, PR	56	N/A	N/A	BARDA	N/A
60		P5-C	2	USA, PR	56	N/A	N/A	BARDA	N/A
61		P5-D	2	USA, PR	56	N/A	N/A	BARDA	N/A
62		P5-E	2	USA, PR	56	N/A	N/A	BARDA	N/A
63		P5-F	2	USA, PR	56	N/A	N/A	BARDA	N/A
64		P5-G	2	USA, PR	56	N/A	N/A	BARDA	N/A
65		P5-H	2	USA, NY	120	N/A	N/A	BARDA	N/A
66		P5-I	2	USA, NY	160	N/A	N/A	BARDA	N/A
67		P5-J	2	N/A	N/A	N/A	N/A	BARDA	N/A
68		P5-K	2	USA, NY	150	N/A	N/A	BARDA	N/A
69		P5-L	2	USA, NY	150	N/A	N/A	BARDA	N/A
70		P5-M	2	USA, NY	84	N/A	N/A	BARDA	N/A
71		P5-N	2	USA, MD	35	N/A	N/A	BARDA	N/A
72		P5-O	2	USA, NY	70	N/A	N/A	BARDA	N/A
73		P5-P	2	USA, NY	N/A	N/A	N/A	BARDA	N/A
74		P5-Q	2	USA, PR	56	N/A	N/A	BARDA	N/A
75		P5-R	2	N/A	N/A	N/A	N/A	BARDA	N/A
76		P5-S	2	USA, NY	N/A	N/A	N/A	BARDA	N/A
77		P5-T	2	USA, NY	N/A	N/A	N/A	BARDA	N/A
78	DENVpZIKV	1369.13.A.2	2 and 3	Nicaragua	15	N/A	N/A	University of California, Berkeley	DENV immun ZIKV POS
79	DENVpZIKV	1659.13.A.2	2 and 3	Nicaragua	16	N/A	N/A	University of California, Berkeley	DENV immun ZIKV POS
80	DENVpZIKV	2007.13.A.2	2 and 3	Nicaragua	15	N/A	N/A	University of California, Berkeley	DENV immun ZIKV POS
81	DENVpZIKV	201.13.A.2	2 and 3	Nicaragua	15	N/A	N/A	University of California, Berkeley	DENV immun ZIKV POS
82	DENVpZIKV	3132.13.A.2	2 and 3	Nicaragua	16	N/A	N/A	University of California, Berkeley	DENV immun ZIKV POS
83	DENVpZIKV	4069.13.A.2	2 and 3	Nicaragua	15	N/A	N/A	University of California, Berkeley	DENV immun ZIKV POS
84	DENVpZIKV	4203.13.A.2	2 and 3	Nicaragua	16	N/A	N/A	University of California, Berkeley	DENV immun ZIKV POS
85	DENVpZIKV	4515.13.A.2	2 and 3	Nicaragua	15	N/A	N/A	University of California, Berkeley	DENV immun ZIKV POS
86	DENVpZIKV	4723.13.A.2	2 and 3	Nicaragua	16	N/A	N/A	University of California, Berkeley	DENV immun ZIKV POS
87	DENVpZIKV	4749.13.A.2	2 and 3	Nicaragua	15	N/A	N/A	University of California, Berkeley	DENV immun ZIKV POS
88	DENVpZIKV	4772.13.A.2	2 and 3	Nicaragua	15	N/A	N/A	University of California, Berkeley	DENV immun ZIKV POS
89	DENVpZIKV	4817.13.A.2	2 and 3	Nicaragua	15	N/A	N/A	University of California, Berkeley	DENV immun ZIKV POS
90	DENVpZIKV	4858.13.A.2	2 and 3	Nicaragua	15	N/A	N/A	University of California, Berkeley	DENV immun ZIKV POS
91	DENVpZIKV	5013.13.A.2	2 and 3	Nicaragua	14	N/A	N/A	University of California, Berkeley	DENV immun ZIKV POS
92	DENVpZIKV	5066.13.A.2	2 and 3	Nicaragua	15	N/A	N/A	University of California, Berkeley	DENV immun ZIKV POS
93	DENVpZIKV	5256.13.A.2	2 and 3	Nicaragua	15	N/A	N/A	University of California, Berkeley	DENV immun ZIKV POS
94	DENVpZIKV	5329.13.A.2	2 and 3	Nicaragua	17	N/A	N/A	University of California, Berkeley	DENV immun ZIKV POS
95	DENVpZIKV	5338.13.A.2	2 and 3	Nicaragua	15	N/A	N/A	University of California, Berkeley	DENV immun ZIKV POS
96	DENVpZIKV	6215.13.A.2	2 and 3	Nicaragua	15	N/A	N/A	University of California, Berkeley	DENV immun ZIKV POS
97	DENVpZIKV	6775.13.A.2	2 and 3	Nicaragua	15	N/A	N/A	University of California, Berkeley	DENV immun ZIKV POS
98	DENVpZIKV	7031.13.A.2	2 and 3	Nicaragua	15	N/A	N/A	University of California, Berkeley	DENV immun ZIKV POS
99	DENVpZIKV	726.13.A.2	2 and 3	Nicaragua	16	N/A	N/A	University of California, Berkeley	DENV immun ZIKV POS
100	DENVpZIKV	7320.13.A.2	2 and 3	Nicaragua	16	N/A	N/A	University of California, Berkeley	DENV immun ZIKV POS
101	DENVpZIKV	7383.13.A.2	2 and 3	Nicaragua	17	N/A	N/A	University of California, Berkeley	DENV immun ZIKV POS
102	DENVpZIKV	7487.13.A.2	2 and 3	Nicaragua	15	N/A	N/A	University of California, Berkeley	DENV immun ZIKV POS
103	pZIKV	1304.13.A.2	2 and 3	Nicaragua	16	N/A	N/A	University of California, Berkeley	primary ZIKV
104	pZIKV	2226.13.A.2	2 and 3	Nicaragua	16	N/A	N/A	University of California, Berkeley	primary ZIKV
105	pZIKV	3758.13.A.2	2 and 3	Nicaragua	15	N/A	N/A	University of California, Berkeley	primary ZIKV
106	pZIKV	4041.13.A.2	2 and 3	Nicaragua	16	N/A	N/A	University of California, Berkeley	primary ZIKV
107	pZIKV	4243.13.A.2	2 and 3	Nicaragua	15	N/A	N/A	University of California, Berkeley	primary ZIKV
108	pZIKV	4359.13.A.2	2 and 3	Nicaragua	15	N/A	N/A	University of California, Berkeley	primary ZIKV
109	pZIKV	4445.13.A.2	2 and 3	Nicaragua	15	N/A	N/A	University of California, Berkeley	primary ZIKV
110	pZIKV	4606.13.A.2	2 and 3	Nicaragua	15	N/A	N/A	University of California, Berkeley	primary ZIKV
111	pZIKV	4797.13.A.2	2 and 3	Nicaragua	16	N/A	N/A	University of California, Berkeley	primary ZIKV
112	pZIKV	4948.13.A.2	2 and 3	Nicaragua	15	N/A	N/A	University of California, Berkeley	primary ZIKV
113	pZIKV	5138.13.A.2	2 and 3	Nicaragua	15	N/A	N/A	University of California, Berkeley	primary ZIKV
114	pZIKV	5149.13.A.2	2 and 3	Nicaragua	15	N/A	N/A	University of California, Berkeley	primary ZIKV
115	pZIKV	5355.13.A.2	2 and 3	Nicaragua	15	N/A	N/A	University of California, Berkeley	primary ZIKV
116	pZIKV	5406.13.A.2	2 and 3	Nicaragua	15	N/A	N/A	University of California, Berkeley	primary ZIKV
117	pZIKV	5893.13.A.2	2 and 3	Nicaragua	15	N/A	N/A	University of California, Berkeley	primary ZIKV
118	pZIKV	6248.13.A.2	2 and 3	Nicaragua	16	N/A	N/A	University of California, Berkeley	primary ZIKV
119	pZIKV	6253.13.A.2	2 and 3	Nicaragua	16	N/A	N/A	University of California, Berkeley	primary ZIKV
120	pZIKV	6558.13.A.2	2 and 3	Nicaragua	15	N/A	N/A	University of California, Berkeley	primary ZIKV
121	pZIKV	6563.13.A.2	2 and 3	Nicaragua	17	N/A	N/A	University of California, Berkeley	primary ZIKV
122	pZIKV	6605.13.A.2	2 and 3	Nicaragua	15	N/A	N/A	University of California, Berkeley	primary ZIKV
123	pZIKV	6643.13.A.2	2 and 3	Nicaragua	15	N/A	N/A	University of California, Berkeley	primary ZIKV
124	pZIKV	6661.13.A.2	2 and 3	Nicaragua	16	N/A	N/A	University of California, Berkeley	primary ZIKV
125	pZIKV	6669.13.A.2	2 and 3	Nicaragua	15	N/A	N/A	University of California, Berkeley	primary ZIKV
126	pZIKV	6697.13.A.2	2 and 3	Nicaragua	24	N/A	N/A	University of California, Berkeley	primary ZIKV
127	pZIKV	6739.13.B.2	2 and 3	Nicaragua	16	N/A	N/A	University of California, Berkeley	primary ZIKV
DENV
1	pDENV	5743.8.A.2	3	Nicaragua	19	N/A	N/A	University of California, Berkeley	primary DENV
2	pDENV	5669.7.A.2	3	Nicaragua	30	N/A	N/A	University of California, Berkeley	primary DENV
3	pDENV	5547.9.A.2	3	Nicaragua	22	N/A	N/A	University of California, Berkeley	primary DENV
4	pDENV	5564.9.A.2	3	Nicaragua	18	N/A	N/A	University of California, Berkeley	primary DENV
5	pDENV	5684.9.A.2	3	Nicaragua	15	N/A	N/A	University of California, Berkeley	primary DENV
6	pDENV	5869.8.A.2	3	Nicaragua	17	N/A	N/A	University of California, Berkeley	primary DENV
7	pDENV	6404.9.A.2	3	Nicaragua	15	N/A	N/A	University of California, Berkeley	primary DENV
8	pDENV	5344.10.A.2	3	Nicaragua	24	N/A	N/A	University of California, Berkeley	primary DENV
9	pDENV	5575.10.A.2	3	Nicaragua	15	N/A	N/A	University of California, Berkeley	primary DENV
10	pDENV	5970.10.A.2	3	Nicaragua	44	N/A	N/A	University of California, Berkeley	primary DENV
11	pDENV	6039.6.A.2	3	Nicaragua	16	N/A	N/A	University of California, Berkeley	primary DENV
12	pDENV	6143.8.B.2	3	Nicaragua	16	N/A	N/A	University of California, Berkeley	primary DENV
13	pDENV	6453.10.A.2	3	Nicaragua	16	N/A	N/A	University of California, Berkeley	primary DENV
14	pDENV	7139.10.A.2	3	Nicaragua	16	N/A	N/A	University of California, Berkeley	primary DENV
15	pDENV	7146.10.A.2	3	Nicaragua	15	N/A	N/A	University of California, Berkeley	primary DENV
16	pDENV	7164.10.A.2	3	Nicaragua	23	N/A	N/A	University of California, Berkeley	primary DENV
17	pDENV	7427.10.A.2	3	Nicaragua	15	N/A	N/A	University of California, Berkeley	primary DENV
18	pDENV	8891.12.A.2	3	Nicaragua	31	N/A	N/A	University of California, Berkeley	primary DENV
19	pDENV	9225.13.A.2	3	Nicaragua	16	N/A	N/A	University of California, Berkeley	primary DENV
20	pDENV	5412.12.A.2	3	Nicaragua	15	N/A	N/A	University of California, Berkeley	primary DENV
21	pDENV	6547.12.B.2	3	Nicaragua	17	N/A	N/A	University of California, Berkeley	primary DENV
22	pDENV	6761.12.A.2	3	Nicaragua	16	N/A	N/A	University of California, Berkeley	primary DENV
23	pDENV	8958.12.A.2	3	Nicaragua	24	N/A	N/A	University of California, Berkeley	primary DENV
24	pDENV	5870.13.A.2	3	Nicaragua	14	N/A	N/A	University of California, Berkeley	primary DENV
25	pDENV	6487.13.A.2	3	Nicaragua	21	N/A	N/A	University of California, Berkeley	primary DENV
26	sDENV	4410.7.A.2	3	Nicaragua	16	N/A	N/A	University of California, Berkeley	secondary DENV
27	sDENV	4515.6.A.2	3	Nicaragua	25	N/A	N/A	University of California, Berkeley	secondary DENV
28	sDENV	4718.10.A.2	3	Nicaragua	15	N/A	N/A	University of California, Berkeley	secondary DENV
29	sDENV	4777.7.A.2	3	Nicaragua	17	N/A	N/A	University of California, Berkeley	secondary DENV
30	sDENV	4834.11.A.2	3	Nicaragua	16	N/A	N/A	University of California, Berkeley	secondary DENV
31	sDENV	4894.10.A.2	3	Nicaragua	15	N/A	N/A	University of California, Berkeley	secondary DENV
32	sDENV	4966.9.A.2	3	Nicaragua	17	N/A	N/A	University of California, Berkeley	secondary DENV
33	sDENV	5129.10.A.2	3	Nicaragua	15	N/A	N/A	University of California, Berkeley	secondary DENV
34	sDENV	5262.12.B.2	3	Nicaragua	15	N/A	N/A	University of California, Berkeley	secondary DENV
35	sDENV	5345.7.A.2	3	Nicaragua	16	N/A	N/A	University of California, Berkeley	secondary DENV
36	sDENV	5435.12.A.2	3	Nicaragua	15	N/A	N/A	University of California, Berkeley	secondary DENV
37	sDENV	5506.8.A.2	3	Nicaragua	23	N/A	N/A	University of California, Berkeley	secondary DENV
38	sDENV	5592.11.A.2	3	Nicaragua	16	N/A	N/A	University of California, Berkeley	secondary DENV
39	sDENV	5688.9.A.2	3	Nicaragua	21	N/A	N/A	University of California, Berkeley	secondary DENV
40	sDENV	5842.7.A.2	3	Nicaragua	15	N/A	N/A	University of California, Berkeley	secondary DENV
41	sDENV	5970.12.A.2	3	Nicaragua	15	N/A	N/A	University of California, Berkeley	secondary DENV
42	sDENV	6018.10.B.2	3	Nicaragua	32	N/A	N/A	University of California, Berkeley	secondary DENV
43	sDENV	6490.12.B.2	3	Nicaragua	17	N/A	N/A	University of California, Berkeley	secondary DENV
44	sDENV	6545.12.A.2	3	Nicaragua	15	N/A	N/A	University of California, Berkeley	secondary DENV
45	sDENV	6596.12.A.2	3	Nicaragua	21	N/A	N/A	University of California, Berkeley	secondary DENV
46	sDENV	6629.12.A.2	3	Nicaragua	42	N/A	N/A	University of California, Berkeley	secondary DENV
47	sDENV	7404.12.A.2	3	Nicaragua	15	N/A	N/A	University of California, Berkeley	secondary DENV
48	sDENV	8246.12.B.2	3	Nicaragua	15	N/A	N/A	University of California, Berkeley	secondary DENV
49	sDENV	8595.12.B.2	3	Nicaragua	15	N/A	N/A	University of California, Berkeley	secondary DENV
50	sDENV	8890.13.A.2	3	Nicaragua	24	N/A	N/A	University of California, Berkeley	secondary DENV
51	pDENV_3m	527.2B	3	Nicaragua	>90	N/A	N/A	University of California, Berkeley	late stage primary DENV
52	pDENV_3m	1089.5B	3	Nicaragua	>90	N/A	N/A	University of California, Berkeley	late stage primary DENV
53	pDENV_3m	5506.7B	3	Nicaragua	>90	N/A	N/A	University of California, Berkeley	late stage primary DENV
54	pDENV_3m	918.2B	3	Nicaragua	>90	N/A	N/A	University of California, Berkeley	late stage primary DENV
55	pDENV_3m	2347.2B	3	Nicaragua	>90	N/A	N/A	University of California, Berkeley	late stage primary DENV
56	pDENV_3m	1264.5B	3	Nicaragua	>90	N/A	N/A	University of California, Berkeley	late stage primary DENV
57	pDENV_3m	964.3B	3	Nicaragua	>90	N/A	N/A	University of California, Berkeley	late stage primary DENV
58	pDENV_3m	4394.7B	3	Nicaragua	>90	N/A	N/A	University of California, Berkeley	late stage primary DENV
59	pDENV_3m	1567.2B	3	Nicaragua	>90	N/A	N/A	University of California, Berkeley	late stage primary DENV
60	pDENV_3m	4202.5B	3	Nicaragua	>90	N/A	N/A	University of California, Berkeley	late stage primary DENV
61	pDENV_3m	4082.7B	3	Nicaragua	>90	N/A	N/A	University of California, Berkeley	late stage primary DENV
62	pDENV_3m	86.2B	3	Nicaragua	>90	N/A	N/A	University of California, Berkeley	late stage primary DENV
63	pDENV_3m	1088.4B	3	Nicaragua	>90	N/A	N/A	University of California, Berkeley	late stage primary DENV
64	pDENV_3m	1791.2B	3	Nicaragua	>90	N/A	N/A	University of California, Berkeley	late stage primary DENV
65	pDENV_3m	2608.3B	3	Nicaragua	>90	N/A	N/A	University of California, Berkeley	late stage primary DENV
66	pDENV_3m	3325.2B	3	Nicaragua	>90	N/A	N/A	University of California, Berkeley	late stage primary DENV
67	pDENV_3m	3329.3B	3	Nicaragua	>90	N/A	N/A	University of California, Berkeley	late stage primary DENV
68	pDENV_3m	3383.3B	3	Nicaragua	>90	N/A	N/A	University of California, Berkeley	late stage primary DENV
69	pDENV_3m	714.5B	3	Nicaragua	>90	N/A	N/A	University of California, Berkeley	late stage primary DENV
70	pDENV_3m	1759.4B	3	Nicaragua	>90	N/A	N/A	University of California, Berkeley	late stage primary DENV
71	sDENV_3m	5663.7B	3	Nicaragua	>90	N/A	N/A	University of California, Berkeley	late stage secondary DENV
72	sDENV_3m	3383.4B	3	Nicaragua	>90	N/A	N/A	University of California, Berkeley	late stage secondary DENV
73	sDENV_3m	918.3B	3	Nicaragua	>90	N/A	N/A	University of California, Berkeley	late stage secondary DENV
74	sDENV_3m	4191.5B	3	Nicaragua	>90	N/A	N/A	University of California, Berkeley	late stage secondary DENV
75	sDENV_3m	1567.3B	3	Nicaragua	>90	N/A	N/A	University of California, Berkeley	late stage secondary DENV
76	sDENV_3m	3325.4B	3	Nicaragua	>90	N/A	N/A	University of California, Berkeley	late stage secondary DENV
77	sDENV_3m	1651.5B	3	Nicaragua	>90	N/A	N/A	University of California, Berkeley	late stage secondary DENV
78	sDENV_3m	2898.7B	3	Nicaragua	>90	N/A	N/A	University of California, Berkeley	late stage secondary DENV
79	sDENV_3m	3428.7B	3	Nicaragua	>90	N/A	N/A	University of California, Berkeley	late stage secondary DENV
80	sDENV_3m	2456.8B	3	Nicaragua	>90	N/A	N/A	University of California, Berkeley	late stage secondary DENV
81	sDENV_3m	4202.7B	3	Nicaragua	>90	N/A	N/A	University of California, Berkeley	late stage secondary DENV
82	sDENV_3m	13.4B	3	Nicaragua	>90	N/A	N/A	University of California, Berkeley	late stage secondary DENV
83	sDENV_3m	86.7B	3	Nicaragua	>90	N/A	N/A	University of California, Berkeley	late stage secondary DENV
84	sDENV_3m	1088.7B	3	Nicaragua	>90	N/A	N/A	University of California, Berkeley	late stage secondary DENV
85	sDENV_3m	1791.8B	3	Nicaragua	>90	N/A	N/A	University of California, Berkeley	late stage secondary DENV
86	sDENV_3m	2608.4B	3	Nicaragua	>90	N/A	N/A	University of California, Berkeley	late stage secondary DENV
87	sDENV_3m	3329.7B	3	Nicaragua	>90	N/A	N/A	University of California, Berkeley	late stage secondary DENV
88	sDENV_3m	4213.5B	3	Nicaragua	>90	N/A	N/A	University of California, Berkeley	late stage secondary DENV
89	sDENV_3m	4233.6B	3	Nicaragua	>90	N/A	N/A	University of California, Berkeley	late stage secondary DENV
90	sDENV_3m	4991.7B	3	Nicaragua	>90	N/A	N/A	University of California, Berkeley	late stage secondary DENV

## Sheet: Table 2. ELISA results
Supplementary table 2: ELISA results
			ELISA results - ZIKV
No.	internal No.	Cat. No.	DIA PRO_ZIKV_IGG	DIA PRO_ZIKV_IGM	SD_DENV_IGG	SD_DENV_IGM	EUROIMMUN_CHIKV_IGG	EUROIMMUN_CHIKV_IGM	CDC MAC-ELISA	DENV iELISA	ZIKV NS1 BOB ELISA
1	101	1043-TDS-0056	borderline	Neg	Pos	Neg	N/A	N/A	N/A	N/A	N/A
2	103	1043-TDS-0179	Neg	Pos	Pos	Neg	N/A	N/A	N/A	N/A	N/A
3		Panel B Member #2	borderline	Neg	Neg	Pos	N/A	N/A	N/A	N/A	N/A
4		Panel B Member #3	Pos	borderline	Pos	Pos	N/A	N/A	N/A	N/A	N/A
5		Panel B Member #4	Pos	Neg	Neg	Pos	N/A	N/A	N/A	N/A	N/A
6		Panel B Member #7	Pos	Pos	Pos	Pos	N/A	N/A	N/A	N/A	N/A
7		Panel B Member #8	Pos	Neg	Neg	Pos	N/A	N/A	N/A	N/A	N/A
8		Panel B Member #9	Pos	Neg	Pos	Pos	N/A	N/A	N/A	N/A	N/A
9		Panel B Member #10	borderline	Neg	Neg	Neg	N/A	N/A	N/A	N/A	N/A
10		Panel B Member #11	Pos	Pos	Neg	Pos	N/A	N/A	N/A	N/A	N/A
11		Panel B Member #12	Pos	borderline	Neg	Pos	N/A	N/A	N/A	N/A	N/A
12		Panel B Member #13	Pos	Pos	Neg	Pos	N/A	N/A	N/A	N/A	N/A
13		Panel B Member #14	Neg	Neg	Neg	Pos	N/A	N/A	N/A	N/A	N/A
14		Panel B Member #15	Pos	Pos	Pos	Neg	N/A	N/A	N/A	N/A	N/A
15		Panel B Member #17	Pos	Pos	Pos	Neg	N/A	N/A	N/A	N/A	N/A
16		Panel B Member #18	Pos	Pos	Pos	Pos	N/A	N/A	N/A	N/A	N/A
17		Panel B Member #20	Pos	Neg	Pos	Pos	N/A	N/A	N/A	N/A	N/A
18		Panel B Member #21	Pos	Neg	Neg	Neg	N/A	N/A	N/A	N/A	N/A
19		Panel B Member #22	Pos	borderline	Pos	Neg	N/A	N/A	N/A	N/A	N/A
20		Panel B Member #23	Pos	Neg	Pos	Pos	N/A	N/A	N/A	N/A	N/A
21		Panel B Member #24	Pos	Neg	Neg	Pos	N/A	N/A	N/A	N/A	N/A
22		Panel B Member #25	Pos	Pos	Pos	Neg	N/A	N/A	N/A	N/A	N/A
23	220-1	1043-TDS-0220	Pos	Pos	Pos	Neg	Neg	Neg	N/A	N/A	N/A
24	220-2	1043-TDS-0220	Pos	borderline	Pos	Neg	Pos	Neg	N/A	N/A	N/A
25	220-3	1043-TDS-0220	Pos	Pos	Pos	Neg	Pos	Neg	N/A	N/A	N/A
26	220-4	1043-TDS-0220	Pos	Pos	Pos	Neg	Pos	Neg	N/A	N/A	N/A
27	220-5	1043-TDS-0220	Pos	Pos	Pos	Neg	Pos	Neg	N/A	N/A	N/A
28	220-6	1043-TDS-0220	Pos	Pos	Pos	Neg	Pos	Neg	N/A	N/A	N/A
29	220-7	1043-TDS-0220	Pos	Pos	Pos	Neg	Pos	Neg	N/A	N/A	N/A
30	230-2	1043-TDS-0230	Pos	borderline	Pos	Pos	Pos	Pos	N/A	N/A	N/A
31	230-3	1043-TDS-0230	Pos	Pos	Pos	Pos	Pos	Pos	N/A	N/A	N/A
32	230-4	1043-TDS-0230	Pos	Pos	Pos	Neg	Pos	Pos	N/A	N/A	N/A
33	230-5	1043-TDS-0230	Pos	Pos	Pos	Neg	Pos	Pos	N/A	N/A	N/A
34	230-6	1043-TDS-0230	Pos	Pos	Pos	Neg	Pos	Pos	N/A	N/A	N/A
35	230-8	1043-TDS-0230	Pos	Pos	Pos	Neg	N/A	N/A	N/A	N/A	N/A
36	238-1	1043-TDS-0238	Neg	Pos	Neg	Neg	N/A	N/A	N/A	N/A	N/A
37	238-3	1043-TDS-0238	Pos	Pos	Pos	Neg	N/A	N/A	N/A	N/A	N/A
38	238-4	1043-TDS-0238	Pos	Pos	Pos	Neg	N/A	N/A	N/A	N/A	N/A
39	238-5	1043-TDS-0238	Pos	Pos	Pos	Neg	N/A	N/A	N/A	N/A	N/A
40	238-6	1043-TDS-0238	Pos	Pos	Pos	Neg	N/A	N/A	N/A	N/A	N/A
41	238-7	1043-TDS-0238	Pos	Pos	Pos	Neg	N/A	N/A	N/A	N/A	N/A
42		P4-A	N/A	N/A	N/A	N/A	N/A	N/A	ZIKV IgM Pos	N/A	N/A
43		P4-B	N/A	N/A	N/A	N/A	N/A	N/A	ZIKV IgM Neg	N/A	N/A
44		P4-C	N/A	N/A	N/A	N/A	N/A	N/A	ZIKV IgM Pos	N/A	N/A
45		P4-D	N/A	N/A	N/A	N/A	N/A	N/A	ZIKV IgM Pos	N/A	N/A
46		P4-E	N/A	N/A	N/A	N/A	N/A	N/A	Zika IgM Pos	N/A	N/A
47		P4-F	N/A	N/A	N/A	N/A	N/A	N/A	Zika IgM Pos/Neg	N/A	N/A
48		P4-G	N/A	N/A	N/A	N/A	N/A	N/A	Zika IgM Neg	N/A	N/A
49		P4-H	N/A	N/A	N/A	N/A	N/A	N/A	Zika IgM Pos	N/A	N/A
50		P4-I	N/A	N/A	N/A	N/A	N/A	N/A	Zika IgM Pos	N/A	N/A
51		P4-J	N/A	N/A	N/A	N/A	N/A	N/A	Zika IgM Pos	N/A	N/A
52		P4-K	N/A	N/A	N/A	N/A	N/A	N/A	Zika IgM Pos	N/A	N/A
53		P4-L	N/A	N/A	N/A	N/A	N/A	N/A	Zika IgM Pos	N/A	N/A
54		P4-M	N/A	N/A	N/A	N/A	N/A	N/A	Zika IgM Pos	N/A	N/A
55		P4-N	N/A	N/A	N/A	N/A	N/A	N/A	Zika IgM Neg	N/A	N/A
56		P4-O	N/A	N/A	N/A	N/A	N/A	N/A	Zika IgM Pos	N/A	N/A
57		P4-P	N/A	N/A	N/A	N/A	N/A	N/A	Zika IgM Pos	N/A	N/A
58		P5-A	N/A	N/A	N/A	N/A	N/A	N/A	Zika IgM Pos	N/A	N/A
59		P5-B	N/A	N/A	N/A	N/A	N/A	N/A	Zika IgM Pos	N/A	N/A
60		P5-C	N/A	N/A	N/A	N/A	N/A	N/A	Zika IgM Pos	N/A	N/A
61		P5-D	N/A	N/A	N/A	N/A	N/A	N/A	Zika IgM Pos	N/A	N/A
62		P5-E	N/A	N/A	N/A	N/A	N/A	N/A	Zika IgM Pos	N/A	N/A
63		P5-F	N/A	N/A	N/A	N/A	N/A	N/A	Zika IgM Pos	N/A	N/A
64		P5-G	N/A	N/A	N/A	N/A	N/A	N/A	Zika IgM Pos	N/A	N/A
65		P5-H	N/A	N/A	N/A	N/A	N/A	N/A	Zika IgM Pos	N/A	N/A
66		P5-I	N/A	N/A	N/A	N/A	N/A	N/A	Zika IgM Pos	N/A	N/A
67		P5-J	N/A	N/A	N/A	N/A	N/A	N/A	Zika IgM Neg	N/A	N/A
68		P5-K	N/A	N/A	N/A	N/A	N/A	N/A	Zika IgM Pos/Neg	N/A	N/A
69		P5-L	N/A	N/A	N/A	N/A	N/A	N/A	Zika IgM Pos	N/A	N/A
70		P5-M	N/A	N/A	N/A	N/A	N/A	N/A	Zika IgM Pos	N/A	N/A
71		P5-N	N/A	N/A	N/A	N/A	N/A	N/A	Zika IgM Pos	N/A	N/A
72		P5-O	N/A	N/A	N/A	N/A	N/A	N/A	Zika IgM Pos	N/A	N/A
73		P5-P	N/A	N/A	N/A	N/A	N/A	N/A	Zika IgM Pos	N/A	N/A
74		P5-Q	N/A	N/A	N/A	N/A	N/A	N/A	Zika IgM Pos	N/A	N/A
75		P5-R	N/A	N/A	N/A	N/A	N/A	N/A	Zika IgM Neg	N/A	N/A
76		P5-S	N/A	N/A	N/A	N/A	N/A	N/A	Zika IgM Pos	N/A	N/A
77		P5-T	N/A	N/A	N/A	N/A	N/A	N/A	Zika IgM Pos	N/A	N/A
78	DENVpZIKV	1369.13.A.2	N/A	N/A	N/A	N/A	N/A	N/A	N/A	Pos	Pos
79	DENVpZIKV	1659.13.A.2	N/A	N/A	N/A	N/A	N/A	N/A	N/A	Pos	Pos
80	DENVpZIKV	2007.13.A.2	N/A	N/A	N/A	N/A	N/A	N/A	N/A	Pos	Pos
81	DENVpZIKV	201.13.A.2	N/A	N/A	N/A	N/A	N/A	N/A	N/A	Pos	Pos
82	DENVpZIKV	3132.13.A.2	N/A	N/A	N/A	N/A	N/A	N/A	N/A	Pos	Pos
83	DENVpZIKV	4069.13.A.2	N/A	N/A	N/A	N/A	N/A	N/A	N/A	Pos	Pos
84	DENVpZIKV	4203.13.A.2	N/A	N/A	N/A	N/A	N/A	N/A	N/A	Pos	Pos
85	DENVpZIKV	4515.13.A.2	N/A	N/A	N/A	N/A	N/A	N/A	N/A	Pos	Pos
86	DENVpZIKV	4723.13.A.2	N/A	N/A	N/A	N/A	N/A	N/A	N/A	Pos	Pos
87	DENVpZIKV	4749.13.A.2	N/A	N/A	N/A	N/A	N/A	N/A	N/A	Pos	Pos
88	DENVpZIKV	4772.13.A.2	N/A	N/A	N/A	N/A	N/A	N/A	N/A	Pos	Pos
89	DENVpZIKV	4817.13.A.2	N/A	N/A	N/A	N/A	N/A	N/A	N/A	Pos	Pos
90	DENVpZIKV	4858.13.A.2	N/A	N/A	N/A	N/A	N/A	N/A	N/A	Pos	Pos
91	DENVpZIKV	5013.13.A.2	N/A	N/A	N/A	N/A	N/A	N/A	N/A	Pos	Pos
92	DENVpZIKV	5066.13.A.2	N/A	N/A	N/A	N/A	N/A	N/A	N/A	Pos	Pos
93	DENVpZIKV	5256.13.A.2	N/A	N/A	N/A	N/A	N/A	N/A	N/A	Pos	Pos
94	DENVpZIKV	5329.13.A.2	N/A	N/A	N/A	N/A	N/A	N/A	N/A	Pos	Pos
95	DENVpZIKV	5338.13.A.2	N/A	N/A	N/A	N/A	N/A	N/A	N/A	Pos	Pos
96	DENVpZIKV	6215.13.A.2	N/A	N/A	N/A	N/A	N/A	N/A	N/A	Pos	Pos
97	DENVpZIKV	6775.13.A.2	N/A	N/A	N/A	N/A	N/A	N/A	N/A	Pos	Pos
98	DENVpZIKV	7031.13.A.2	N/A	N/A	N/A	N/A	N/A	N/A	N/A	Pos	Pos
99	DENVpZIKV	726.13.A.2	N/A	N/A	N/A	N/A	N/A	N/A	N/A	Pos	Pos
100	DENVpZIKV	7320.13.A.2	N/A	N/A	N/A	N/A	N/A	N/A	N/A	Pos	Pos
101	DENVpZIKV	7383.13.A.2	N/A	N/A	N/A	N/A	N/A	N/A	N/A	Pos	Pos
102	DENVpZIKV	7487.13.A.2	N/A	N/A	N/A	N/A	N/A	N/A	N/A	Pos	Pos
103	pZIKV	1304.13.A.2	N/A	N/A	N/A	N/A	N/A	N/A	N/A	Neg	Pos
104	pZIKV	2226.13.A.2	N/A	N/A	N/A	N/A	N/A	N/A	N/A	Neg	Pos
105	pZIKV	3758.13.A.2	N/A	N/A	N/A	N/A	N/A	N/A	N/A	Neg	Pos
106	pZIKV	4041.13.A.2	N/A	N/A	N/A	N/A	N/A	N/A	N/A	Neg	Pos
107	pZIKV	4243.13.A.2	N/A	N/A	N/A	N/A	N/A	N/A	N/A	Neg	Pos
108	pZIKV	4359.13.A.2	N/A	N/A	N/A	N/A	N/A	N/A	N/A	Neg	Pos
109	pZIKV	4445.13.A.2	N/A	N/A	N/A	N/A	N/A	N/A	N/A	Neg	Pos
110	pZIKV	4606.13.A.2	N/A	N/A	N/A	N/A	N/A	N/A	N/A	Neg	Pos
111	pZIKV	4797.13.A.2	N/A	N/A	N/A	N/A	N/A	N/A	N/A	Neg	Pos
112	pZIKV	4948.13.A.2	N/A	N/A	N/A	N/A	N/A	N/A	N/A	Neg	Pos
113	pZIKV	5138.13.A.2	N/A	N/A	N/A	N/A	N/A	N/A	N/A	Neg	Pos
114	pZIKV	5149.13.A.2	N/A	N/A	N/A	N/A	N/A	N/A	N/A	Neg	Pos
115	pZIKV	5355.13.A.2	N/A	N/A	N/A	N/A	N/A	N/A	N/A	Neg	Pos
116	pZIKV	5406.13.A.2	N/A	N/A	N/A	N/A	N/A	N/A	N/A	Neg	Pos
117	pZIKV	5893.13.A.2	N/A	N/A	N/A	N/A	N/A	N/A	N/A	Neg	Pos
118	pZIKV	6248.13.A.2	N/A	N/A	N/A	N/A	N/A	N/A	N/A	Neg	Pos
119	pZIKV	6253.13.A.2	N/A	N/A	N/A	N/A	N/A	N/A	N/A	Neg	Pos
120	pZIKV	6558.13.A.2	N/A	N/A	N/A	N/A	N/A	N/A	N/A	Neg	Pos
121	pZIKV	6563.13.A.2	N/A	N/A	N/A	N/A	N/A	N/A	N/A	Neg	Pos
122	pZIKV	6605.13.A.2	N/A	N/A	N/A	N/A	N/A	N/A	N/A	Neg	Pos
123	pZIKV	6643.13.A.2	N/A	N/A	N/A	N/A	N/A	N/A	N/A	Neg	Pos
124	pZIKV	6661.13.A.2	N/A	N/A	N/A	N/A	N/A	N/A	N/A	Neg	Pos
125	pZIKV	6669.13.A.2	N/A	N/A	N/A	N/A	N/A	N/A	N/A	Neg	Pos
126	pZIKV	6697.13.A.2	N/A	N/A	N/A	N/A	N/A	N/A	N/A	Neg	Pos
127	pZIKV	6739.13.B.2	N/A	N/A	N/A	N/A	N/A	N/A	N/A	Neg	Pos
ELISA results - DENV
1	pDENV	5743.8.A.2	N/A	N/A	N/A	N/A	N/A	N/A	N/A	Pos	Neg
2	pDENV	5669.7.A.2	N/A	N/A	N/A	N/A	N/A	N/A	N/A	Pos	Neg
3	pDENV	5547.9.A.2	N/A	N/A	N/A	N/A	N/A	N/A	N/A	Pos	Neg
4	pDENV	5564.9.A.2	N/A	N/A	N/A	N/A	N/A	N/A	N/A	Pos	Neg
5	pDENV	5684.9.A.2	N/A	N/A	N/A	N/A	N/A	N/A	N/A	Pos	Neg
6	pDENV	5869.8.A.2	N/A	N/A	N/A	N/A	N/A	N/A	N/A	Pos	Neg
7	pDENV	6404.9.A.2	N/A	N/A	N/A	N/A	N/A	N/A	N/A	Pos	Neg
8	pDENV	5344.10.A.2	N/A	N/A	N/A	N/A	N/A	N/A	N/A	Pos	Neg
9	pDENV	5575.10.A.2	N/A	N/A	N/A	N/A	N/A	N/A	N/A	Pos	Neg
10	pDENV	5970.10.A.2	N/A	N/A	N/A	N/A	N/A	N/A	N/A	Pos	Neg
11	pDENV	6039.6.A.2	N/A	N/A	N/A	N/A	N/A	N/A	N/A	Pos	Neg
12	pDENV	6143.8.B.2	N/A	N/A	N/A	N/A	N/A	N/A	N/A	Pos	Neg
13	pDENV	6453.10.A.2	N/A	N/A	N/A	N/A	N/A	N/A	N/A	Pos	Neg
14	pDENV	7139.10.A.2	N/A	N/A	N/A	N/A	N/A	N/A	N/A	Pos	Neg
15	pDENV	7146.10.A.2	N/A	N/A	N/A	N/A	N/A	N/A	N/A	Pos	Neg
16	pDENV	7164.10.A.2	N/A	N/A	N/A	N/A	N/A	N/A	N/A	Pos	Neg
17	pDENV	7427.10.A.2	N/A	N/A	N/A	N/A	N/A	N/A	N/A	Pos	Neg
18	pDENV	8891.12.A.2	N/A	N/A	N/A	N/A	N/A	N/A	N/A	Pos	Neg
19	pDENV	9225.13.A.2	N/A	N/A	N/A	N/A	N/A	N/A	N/A	Pos	Neg
20	pDENV	5412.12.A.2	N/A	N/A	N/A	N/A	N/A	N/A	N/A	Pos	Neg
21	pDENV	6547.12.B.2	N/A	N/A	N/A	N/A	N/A	N/A	N/A	Pos	Neg
22	pDENV	6761.12.A.2	N/A	N/A	N/A	N/A	N/A	N/A	N/A	Pos	Neg
23	pDENV	8958.12.A.2	N/A	N/A	N/A	N/A	N/A	N/A	N/A	Pos	Neg
24	pDENV	5870.13.A.2	N/A	N/A	N/A	N/A	N/A	N/A	N/A	Pos	Neg
25	pDENV	6487.13.A.2	N/A	N/A	N/A	N/A	N/A	N/A	N/A	Pos	Neg
26	sDENV	4410.7.A.2	N/A	N/A	N/A	N/A	N/A	N/A	N/A	Pos	Neg
27	sDENV	4515.6.A.2	N/A	N/A	N/A	N/A	N/A	N/A	N/A	Pos	Neg
28	sDENV	4718.10.A.2	N/A	N/A	N/A	N/A	N/A	N/A	N/A	Pos	Neg
29	sDENV	4777.7.A.2	N/A	N/A	N/A	N/A	N/A	N/A	N/A	Pos	Neg
30	sDENV	4834.11.A.2	N/A	N/A	N/A	N/A	N/A	N/A	N/A	Pos	Neg
31	sDENV	4894.10.A.2	N/A	N/A	N/A	N/A	N/A	N/A	N/A	Pos	Neg
32	sDENV	4966.9.A.2	N/A	N/A	N/A	N/A	N/A	N/A	N/A	Pos	Neg
33	sDENV	5129.10.A.2	N/A	N/A	N/A	N/A	N/A	N/A	N/A	Pos	Neg
34	sDENV	5262.12.B.2	N/A	N/A	N/A	N/A	N/A	N/A	N/A	Pos	Neg
35	sDENV	5345.7.A.2	N/A	N/A	N/A	N/A	N/A	N/A	N/A	Pos	Neg
36	sDENV	5435.12.A.2	N/A	N/A	N/A	N/A	N/A	N/A	N/A	Pos	Neg
37	sDENV	5506.8.A.2	N/A	N/A	N/A	N/A	N/A	N/A	N/A	Pos	Neg
38	sDENV	5592.11.A.2	N/A	N/A	N/A	N/A	N/A	N/A	N/A	Pos	Neg
39	sDENV	5688.9.A.2	N/A	N/A	N/A	N/A	N/A	N/A	N/A	Pos	Neg
40	sDENV	5842.7.A.2	N/A	N/A	N/A	N/A	N/A	N/A	N/A	Pos	Neg
41	sDENV	5970.12.A.2	N/A	N/A	N/A	N/A	N/A	N/A	N/A	Pos	Neg
42	sDENV	6018.10.B.2	N/A	N/A	N/A	N/A	N/A	N/A	N/A	Pos	Neg
43	sDENV	6490.12.B.2	N/A	N/A	N/A	N/A	N/A	N/A	N/A	Pos	Neg
44	sDENV	6545.12.A.2	N/A	N/A	N/A	N/A	N/A	N/A	N/A	Pos	Neg
45	sDENV	6596.12.A.2	N/A	N/A	N/A	N/A	N/A	N/A	N/A	Pos	Neg
46	sDENV	6629.12.A.2	N/A	N/A	N/A	N/A	N/A	N/A	N/A	Pos	Neg
47	sDENV	7404.12.A.2	N/A	N/A	N/A	N/A	N/A	N/A	N/A	Pos	Neg
48	sDENV	8246.12.B.2	N/A	N/A	N/A	N/A	N/A	N/A	N/A	Pos	Neg
49	sDENV	8595.12.B.2	N/A	N/A	N/A	N/A	N/A	N/A	N/A	Pos	Neg
50	sDENV	8890.13.A.2	N/A	N/A	N/A	N/A	N/A	N/A	N/A	Pos	Neg
51	pDENV_3m	527.2B	N/A	N/A	N/A	N/A	N/A	N/A	N/A	Pos	Neg
52	pDENV_3m	1089.5B	N/A	N/A	N/A	N/A	N/A	N/A	N/A	Pos	Neg
53	pDENV_3m	5506.7B	N/A	N/A	N/A	N/A	N/A	N/A	N/A	Pos	Neg
54	pDENV_3m	918.2B	N/A	N/A	N/A	N/A	N/A	N/A	N/A	Pos	Neg
55	pDENV_3m	2347.2B	N/A	N/A	N/A	N/A	N/A	N/A	N/A	Pos	Neg
56	pDENV_3m	1264.5B	N/A	N/A	N/A	N/A	N/A	N/A	N/A	Pos	Neg
57	pDENV_3m	964.3B	N/A	N/A	N/A	N/A	N/A	N/A	N/A	Pos	Neg
58	pDENV_3m	4394.7B	N/A	N/A	N/A	N/A	N/A	N/A	N/A	Pos	Neg
59	pDENV_3m	1567.2B	N/A	N/A	N/A	N/A	N/A	N/A	N/A	Pos	Neg
60	pDENV_3m	4202.5B	N/A	N/A	N/A	N/A	N/A	N/A	N/A	Pos	Neg
61	pDENV_3m	4082.7B	N/A	N/A	N/A	N/A	N/A	N/A	N/A	Pos	Neg
62	pDENV_3m	86.2B	N/A	N/A	N/A	N/A	N/A	N/A	N/A	Pos	Neg
63	pDENV_3m	1088.4B	N/A	N/A	N/A	N/A	N/A	N/A	N/A	Pos	Neg
64	pDENV_3m	1791.2B	N/A	N/A	N/A	N/A	N/A	N/A	N/A	Pos	Neg
65	pDENV_3m	2608.3B	N/A	N/A	N/A	N/A	N/A	N/A	N/A	Pos	Neg
66	pDENV_3m	3325.2B	N/A	N/A	N/A	N/A	N/A	N/A	N/A	Pos	Neg
67	pDENV_3m	3329.3B	N/A	N/A	N/A	N/A	N/A	N/A	N/A	Pos	Neg
68	pDENV_3m	3383.3B	N/A	N/A	N/A	N/A	N/A	N/A	N/A	Pos	Neg
69	pDENV_3m	714.5B	N/A	N/A	N/A	N/A	N/A	N/A	N/A	Pos	Neg
70	pDENV_3m	1759.4B	N/A	N/A	N/A	N/A	N/A	N/A	N/A	Pos	Neg
71	sDENV_3m	5663.7B	N/A	N/A	N/A	N/A	N/A	N/A	N/A	Pos	Neg
72	sDENV_3m	3383.4B	N/A	N/A	N/A	N/A	N/A	N/A	N/A	Pos	Neg
73	sDENV_3m	918.3B	N/A	N/A	N/A	N/A	N/A	N/A	N/A	Pos	Neg
74	sDENV_3m	4191.5B	N/A	N/A	N/A	N/A	N/A	N/A	N/A	Pos	Neg
75	sDENV_3m	1567.3B	N/A	N/A	N/A	N/A	N/A	N/A	N/A	Pos	Neg
76	sDENV_3m	3325.4B	N/A	N/A	N/A	N/A	N/A	N/A	N/A	Pos	Neg
77	sDENV_3m	1651.5B	N/A	N/A	N/A	N/A	N/A	N/A	N/A	Pos	Neg
78	sDENV_3m	2898.7B	N/A	N/A	N/A	N/A	N/A	N/A	N/A	Pos	Neg
79	sDENV_3m	3428.7B	N/A	N/A	N/A	N/A	N/A	N/A	N/A	Pos	Neg
80	sDENV_3m	2456.8B	N/A	N/A	N/A	N/A	N/A	N/A	N/A	Pos	Neg
81	sDENV_3m	4202.7B	N/A	N/A	N/A	N/A	N/A	N/A	N/A	Pos	Neg
82	sDENV_3m	13.4B	N/A	N/A	N/A	N/A	N/A	N/A	N/A	Pos	Neg
83	sDENV_3m	86.7B	N/A	N/A	N/A	N/A	N/A	N/A	N/A	Pos	Neg
84	sDENV_3m	1088.7B	N/A	N/A	N/A	N/A	N/A	N/A	N/A	Pos	Neg
85	sDENV_3m	1791.8B	N/A	N/A	N/A	N/A	N/A	N/A	N/A	Pos	Neg
86	sDENV_3m	2608.4B	N/A	N/A	N/A	N/A	N/A	N/A	N/A	Pos	Neg
87	sDENV_3m	3329.7B	N/A	N/A	N/A	N/A	N/A	N/A	N/A	Pos	Neg
88	sDENV_3m	4213.5B	N/A	N/A	N/A	N/A	N/A	N/A	N/A	Pos	Neg
89	sDENV_3m	4233.6B	N/A	N/A	N/A	N/A	N/A	N/A	N/A	Pos	Neg
90	sDENV_3m	4991.7B	N/A	N/A	N/A	N/A	N/A	N/A	N/A	Pos	Neg
